# Supplementary material for: Integrating three types of structure reinforcements abounding in heat-resistant explosives to construct a 3D solvent-free EMOF with superb stability
Source: Royal Society of Chemistry journal article supplement (doi:10.1039/d4nj01652a), 2024-01-01
Supplement: d4nj01652a1.pdf [file d4nj01652a1.pdf]

## Electronic Supplementary Information

### **Integrating three types of structure reinforcements abounding in heat-resistant explosives to construct a 3D solvent-free EMOF with superb stability**

Tianjiao Hou <sup>a</sup>, Huiting Leng <sup>a</sup>, Mengjia Chen <sup>a</sup>, Jun Luo <sup>b</sup>, Chong Zhang <sup>b</sup>,  
Yu Zhang <sup>b</sup>, Zhenxin Yi <sup>b</sup>, Shunlin Zhang <sup>c</sup>, and Xuan Shen <sup>\*a, d</sup>

<sup>a</sup> *State Key Laboratory of Materials-oriented Chemical Engineering, College of Chemical Engineering, Nanjing Tech University, Nanjing, Jiangsu 211816, P. R. China.*

<sup>b</sup> *School of Chemistry and Chemical Engineering, Nanjing University of Science and Technology, Nanjing, Jiangsu 210094, P. R. China.*

<sup>c</sup> *School of Chemistry and Chemical Engineering, Guizhou University, Guiyang, Guizhou 550025, P. R. China.*

<sup>d</sup> *Zhangjiagang Institute of Nanjing Tech University, Suzhou 215600, P. R. China.*

\*Corresponding Author E-mail: shenxuan@njtech.edu.cn

## Contents

|                                           |     |
|-------------------------------------------|-----|
| 1. Synthesis of H <sub>2</sub> DAAT ..... | S3  |
| 2. Crystal structure determination.....   | S4  |
| 3. SEM .....                              | S7  |
| 4. TG-DSC of H <sub>2</sub> DAAT .....    | S7  |
| 5. Spectra of TG-DSC-MS-IR .....          | S8  |
| 6. Sensitivity .....                      | S8  |
| 7. Oxygen bomb calorimetry .....          | S9  |
| 8. Detonation property .....              | S9  |
| 9. NMR spectra .....                      | S12 |
| 10. References.....                       | S15 |

# 1. Synthesis of H<sub>2</sub>DAAT

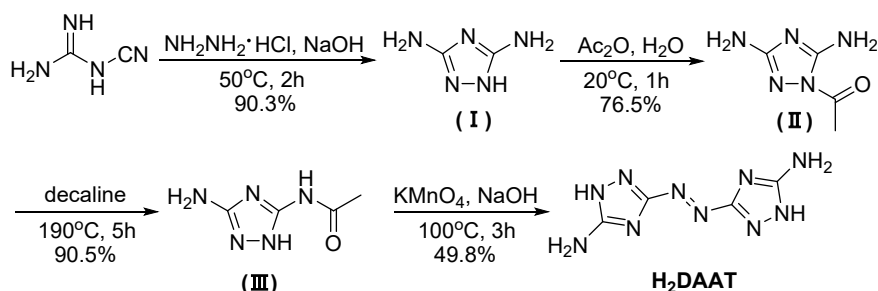

## A. Synthesis of 1H-1,2,4-triazole-3,5-diamine (I)

Dicyandiamide (20.01 g, 0.24 mol) was dissolved in 60 mL water. Then, hydrazine dihydrochloride (27.62 g, 0.26 mol) was added to the solution slowly. The mixture was heated at 50°C for 2 h. Subsequently, the pH of the mixture was adjusted to 10.5 with NaOH solution (3.0 mol·L<sup>-1</sup>)<sup>[1]</sup>. The solvent was removed by vacuum evaporation to obtain a solid white powder **I** (21.22 g, 0.21 mol, 90.3%). <sup>1</sup>H NMR ([D<sub>6</sub>] DMSO, 25°C): δ = 10.64 (s, 1H), 5.01 (s, 4H).

## B. Synthesis of 1-acetyl-3,5-diamino-1H-1,2,4-triazole (II)

According to the literature<sup>[2]</sup>, acetic anhydride (40.8 mL, 1.2 equiv.) was added dropwise under vigorous stirring to a solution of **I** (36.02 g, 0.36 mol) in 130 mL water at room temperature. After stirring for 1 h, the precipitate was filtered off, washed with water, and dried at room temperature to yield **II** as a colorless powder (38.83 g, 0.27 mol, 76.5%). <sup>1</sup>H NMR([D<sub>6</sub>] DMSO): δ = 7.35 (s, 2 H), 5.66 (s, 2 H), 2.33 (s, 3 H). <sup>13</sup>C NMR ([D<sub>6</sub>] DMSO): δ = 169.95, 161.60, 156.47, 23.03.

## C. Synthesis of 3-acetylamino-5-amino-1H-1,2,4-triazole (III)

A mixture of **II** (10.00 g, 70.89 mmol) and decaline (100.0 mL) was heated to reflux with stirring at 187-190°C for 6 h. The solid was filtered off, washed with petroleum ether (100.0 mL) and diethyl ether (100.0 mL). White powder **III** (9.05 g, 64.15 mmol, 90.5%) was obtained by drying in the air. <sup>1</sup>H NMR (D<sub>2</sub>O, NaOH, 25°C): δ= 2.05 (s, 3H). <sup>13</sup>C NMR (D<sub>2</sub>O, NaOH): δ= 173.90, 161.89, 153.96, 22.49.

## D. Synthesis of 5,5'-diamino-3,3'-azo-1H-1,2,4-triazole (H<sub>2</sub>DAAT)

Potassium permanganate (1.54 g, 9.72 mmol) was added over a period of 10 minutes to the solution of **III** (2.00 g, 14.18 mmol) in sodium hydroxide (32%, 15.0 mL) at 0°C. After the addition, the mixture was allowed to reflux for 3 h. The generated

manganese oxide was removed by filtration, and the filtrate was acidified with concentrated hydrochloric acid to pH = 6. The precipitate was filtered and washed with water, and H<sub>2</sub>DAAT was obtained as an orange solid (0.47 g, 2.42 mmol, 49.8%). <sup>13</sup>C NMR (D<sub>2</sub>O, NaOH): δ= 169.80, 164.89.

## 2. Crystal structure determination

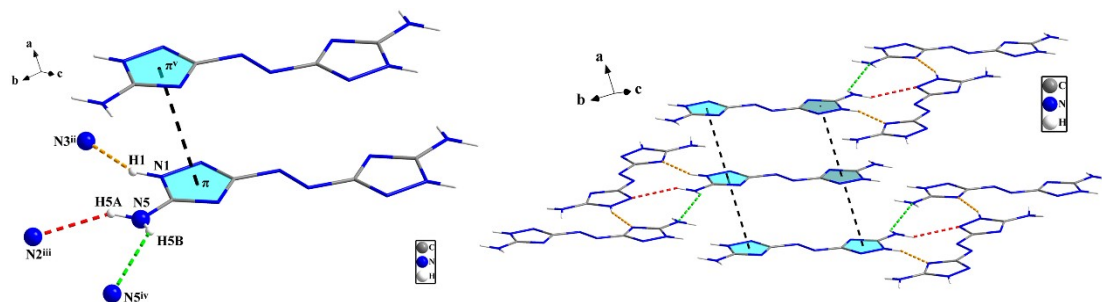

**Fig. S1** View of the crystal packing for H<sub>2</sub>DAAT showing hydrogen bonds, and  $\pi\cdots\pi$  interactions.

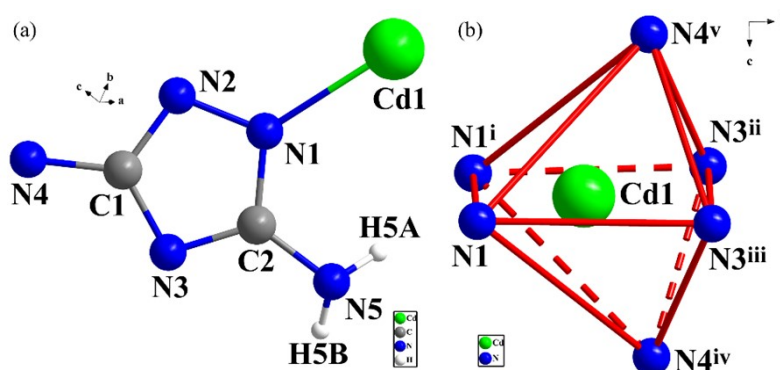

**Fig. S2** (a) The asymmetric unit for **1**; (b) Distorted octahedral configuration of Cd1.

**Table S1** Crystallographic data for H<sub>2</sub>DAAT and EMOF **1**

| Compounds         | H <sub>2</sub> DAAT                           | <b>1</b>                                        |
|-------------------|-----------------------------------------------|-------------------------------------------------|
| CCDC number       | 2244766                                       | 2243170                                         |
| Empirical formula | C <sub>4</sub> H <sub>6</sub> N <sub>10</sub> | C <sub>4</sub> H <sub>4</sub> CdN <sub>10</sub> |
| Formula weight    | 194.19                                        | 304.58                                          |
| Crystal system    | Monoclinic                                    | Orthorhombic                                    |
| Space group       | <i>P</i> 2 <sub>1</sub> / <i>n</i>            | <i>Pbcn</i>                                     |
| <i>a</i> (Å)      | 3.5601(6)                                     | 7.9084(14)                                      |
| <i>b</i> (Å)      | 12.1278(16)                                   | 10.8324(19)                                     |
| <i>c</i> (Å)      | 8.6009(13)                                    | 9.4962(17)                                      |
| $\alpha$ (°)      | 90                                            | 90                                              |
| $\beta$ (°)       | 96.628(6)                                     | 90                                              |
| $\gamma$ (°)      | 90                                            | 90                                              |

|                                              |                                   |                                   |
|----------------------------------------------|-----------------------------------|-----------------------------------|
| $V$ (Å <sup>3</sup> )                        | 368.87(10)                        | 813.5(2)                          |
| $Z$                                          | 2                                 | 4                                 |
| $D_c$ (g·cm <sup>-3</sup> )                  | 1.748                             | 2.487                             |
| $\mu$ (mm <sup>-1</sup> )                    | 0.133                             | 2.667                             |
| $F(000)$                                     | 200                               | 581                               |
| Crystal size (mm <sup>3</sup> )              | 0.15 × 0.13 × 0.12                | 0.15 × 0.14 × 0.12                |
| $\theta$ Range (°)                           | 2.92-27.44                        | 3.19-25.00                        |
| Reflections collected                        | 4164                              | 5668                              |
| Independent reflections                      | 850 [ $R_{\text{int}} = 0.0899$ ] | 715 [ $R_{\text{int}} = 0.0478$ ] |
| Reflections observed [ $I > 2\sigma(I)$ ]    | 571                               | 672                               |
| Data/restraints/parameters                   | 850/0/70                          | 715/0/76                          |
| Goodness-of-fit on $F^2$                     | 1.1295                            | 1.1072                            |
| $R_1/wR_2$ [ $I > 2\sigma(I)$ ]              | 0.0481/0.1029                     | 0.0163/0.0390                     |
| $R_1/wR_2$ (all data)                        | 0.0809/0.1373                     | 0.0171/0.0411                     |
| Max., Min. $\Delta\rho$ (e·Å <sup>-3</sup> ) | 0.3918, -0.4519                   | 0.3315, -0.2994                   |

**Table S2** Selected bond lengths (Å) and angles (°) for H<sub>2</sub>DAAT

| H <sub>2</sub> DAAT |          |                        |          |
|---------------------|----------|------------------------|----------|
| C1-N2               | 1.327(3) | C2-N1                  | 1.337(3) |
| C1-N3               | 1.359(3) | C2-N5                  | 1.351(3) |
| C1-N4               | 1.392(4) | N1-N2                  | 1.371(3) |
| C2-N3               | 1.334(3) | N4-N4 <sup>i</sup>     | 1.274(4) |
| N2-C1-N3            | 115.6(2) | N1-C2-N5               | 124.7(2) |
| N2-C1-N4            | 117.4(2) | C2-N1-N2               | 110.3(2) |
| N3-C1-N4            | 127.1(2) | C1-N2-N1               | 101.5(2) |
| N3-C2-N1            | 110.2(2) | C2-N3-C1               | 102.4(2) |
| N3-C2-N5            | 125.0(2) | N4 <sup>i</sup> -N4-C1 | 112.7(2) |

Symmetry code: i) 1-x, 1-y, 1-z.

**Table S3** Hydrogen-bonding geometry and  $\pi\cdots\pi$  interactions (Å, °) for H<sub>2</sub>DAAT

| D-H $\cdots$ A                                             | d(D-H) | d(H $\cdots$ A) | d(D $\cdots$ A) | $\angle$ D-H $\cdots$ A |
|------------------------------------------------------------|--------|-----------------|-----------------|-------------------------|
| N1-H1 $\cdots$ N3 <sup>ii</sup>                            | 0.879  | 1.958           | 2.779(3)        | 155                     |
| N5-H5A $\cdots$ N2 <sup>iii</sup>                          | 0.888  | 2.404           | 3.168(3)        | 144                     |
| N5-H5B $\cdots$ N5 <sup>iv</sup>                           | 0.856  | 2.687           | 3.326(3)        | 133                     |
| $\pi$ (C1,C2,N1~N4) $\cdots\pi$ (C1,C2,N1~N4) <sup>v</sup> |        | 3.222(3)        |                 | 0                       |

Symmetry codes: ii) 1/2+x, 3/2-y, z-1/2; iii) 3/2-x, 1/2+y, 1/2-z; iv) 1-x, 2-y, 1-z; v) 1+x, y, z.

**Table S4** Selected bond lengths (Å) and angles (°) for EMOF **1**

| EMOF <b>1</b>                           |            |                                       |            |
|-----------------------------------------|------------|---------------------------------------|------------|
| Cd1-N1                                  | 2.262(2)   | Cd1-N4 <sup>iv</sup>                  | 2.494(3)   |
| Cd1-N3 <sup>ii</sup>                    | 2.358(2)   | N4-N4 <sup>vi</sup>                   | 1.292(4)   |
| N1-N2                                   | 1.373(2)   | C1-N4                                 | 1.379(3)   |
| N1 <sup>i</sup> -Cd1-N1                 | 93.43(9)   | N1-Cd1-N4 <sup>iv</sup>               | 101.30(6)  |
| N1-Cd1-N3 <sup>iii</sup>                | 93.06(6)   | N4 <sup>iv</sup> -Cd1-N4 <sup>v</sup> | 135.37(8)  |
| N3 <sup>iii</sup> -Cd1-N4 <sup>v</sup>  | 78.75(6)   | N1-Cd1-N4 <sup>v</sup>                | 108.95(6)  |
| N3 <sup>iii</sup> -Cd1-N4 <sup>iv</sup> | 67.33(8)   | N1-Cd1-N3 <sup>ii</sup>               | 173.10(6)  |
| N3 <sup>ii</sup> -Cd1-N3 <sup>iii</sup> | 80.55(8)   | Cd1-N4 <sup>v</sup> -N4 <sup>ii</sup> | 115.4(2)   |
| N3-C1-N4                                | 125.43(18) | N2-N1-Cd1                             | 123.66(13) |

Symmetry codes: i) 1-x, y, 1/2-z; ii) 1/2+x, 1/2+y, 1/2-z; iii) 1/2-x, 1/2+y, z; iv) 1/2+x, 3/2-y, 1-z; v) 1/2-x, 3/2-y, z-1/2; vi) -x, 1-y, 1-z.

**Table S5** Hydrogen-bonding geometry, N-H $\cdots\pi$ , and  $p\cdots\pi$  interactions (Å, °) for EMOF **1**

| D-H $\cdots$ A                                         | d(D-H) | d(H $\cdots$ A) | d(D $\cdots$ A) | $\angle$ D-H $\cdots$ A |
|--------------------------------------------------------|--------|-----------------|-----------------|-------------------------|
| N5-H5A $\cdots$ N2 <sup>v</sup>                        | 0.888  | 2.182           | 3.052(2)        | 166                     |
| N5-H5B $\cdots\pi$ (C1,C2,N1 $\sim$ N4) <sup>vii</sup> | 0.844  | 2.598           | 3.065(2)        | 138                     |
| $p$ (N5) $\cdots\pi$ (C1,C2,N1 $\sim$ N3) <sup>i</sup> |        |                 | 3.111(2)        |                         |

Symmetry codes: i) 1-x, y, 1/2-z; v) 1/2-x, 3/2-y, z-1/2; vii) x, 1-y, z-1/2.

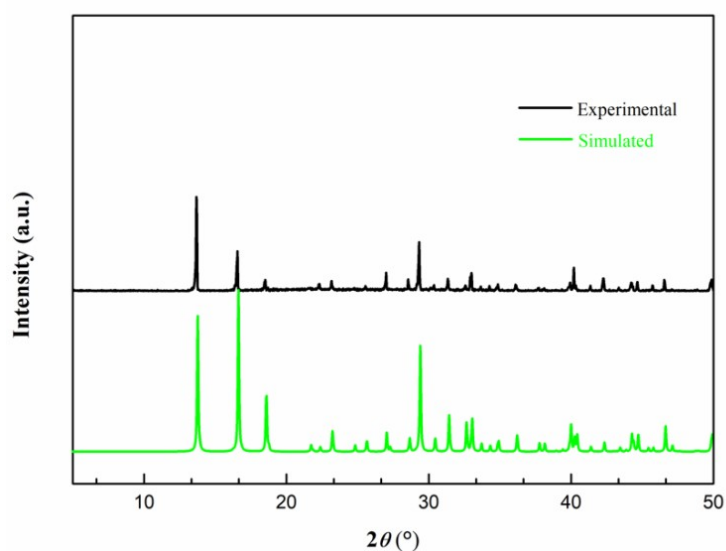**Fig. S3** Powdered X-ray diffraction (PXRD) pattern of EMOF **1**.

### 3. SEM

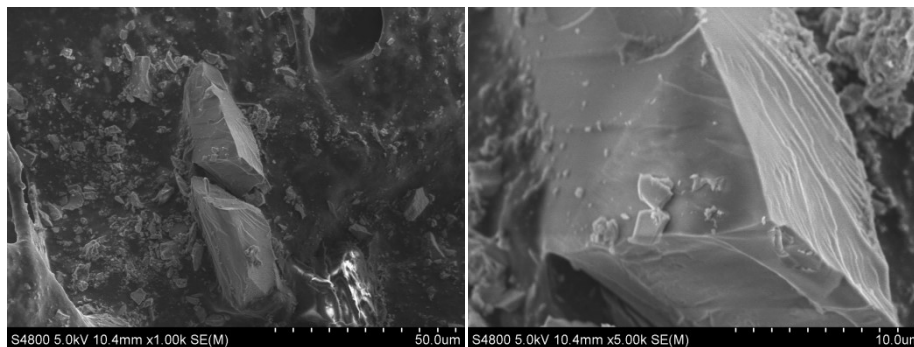

Fig. S4 SEM of EMOF 1.

### 4. TG-DSC of H<sub>2</sub>DAAT

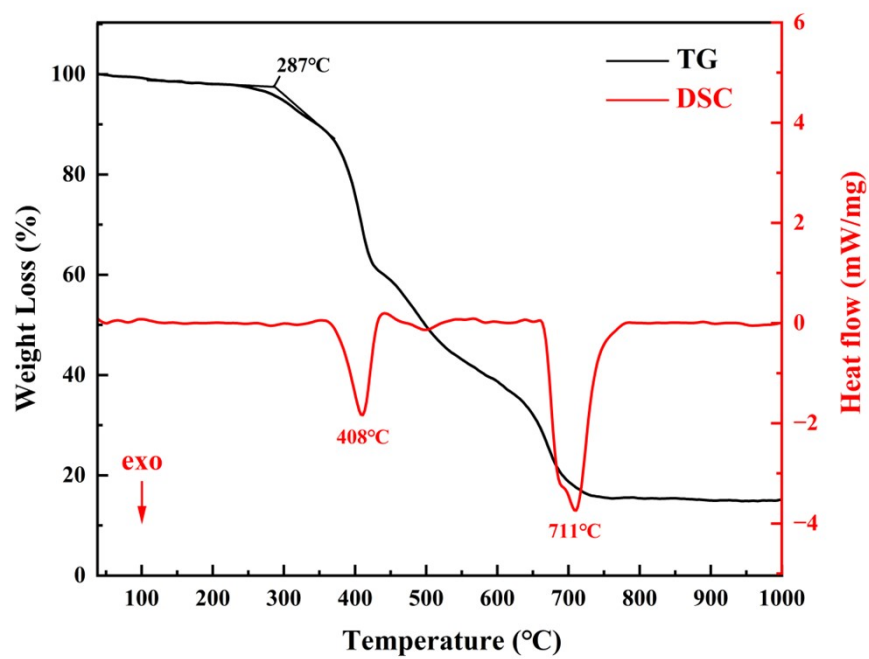

Fig. S5 The TG-DSC curves of H<sub>2</sub>DAAT.

## 5. Spectra of TG-DSC-MS-IR

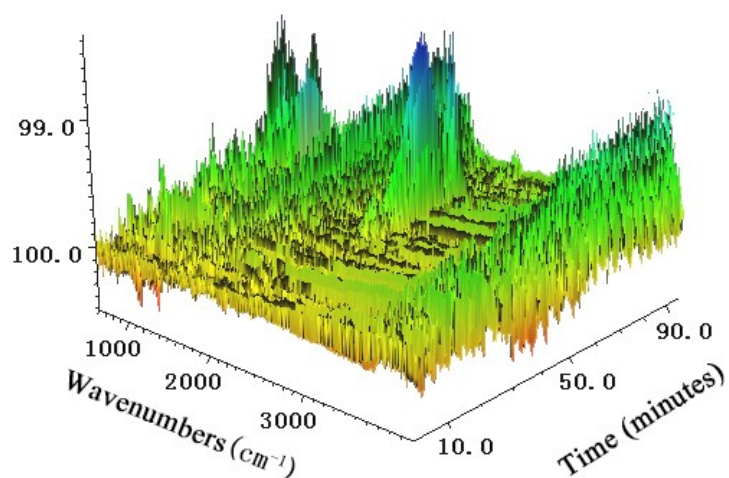

Fig. S6 IR spectra.

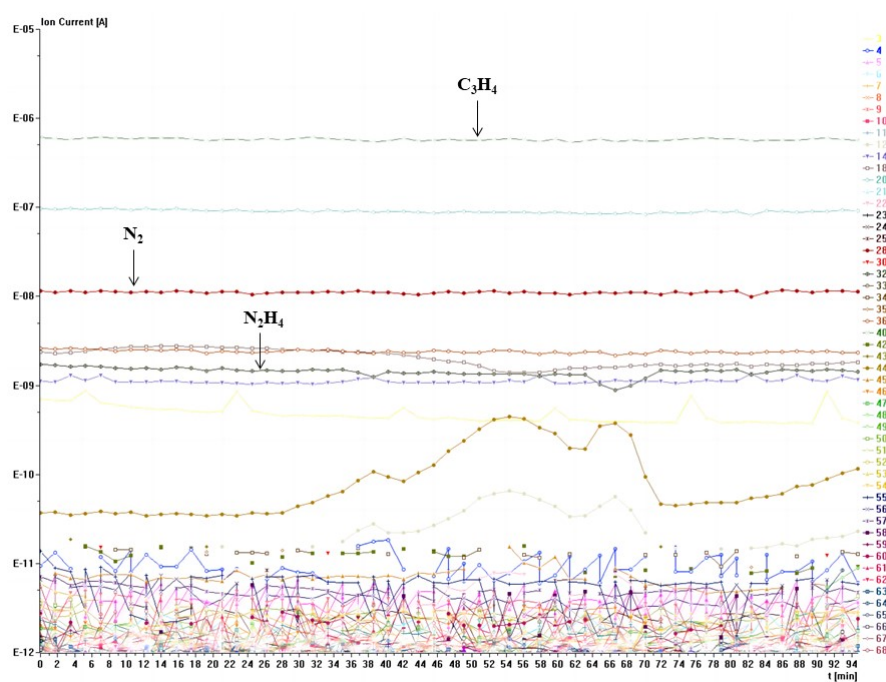

Fig. S7 Mass spectra.

## 6. Sensitivity

Impact sensitivity was determined by the Fall Hammer Apparatus. Twenty milligrams of EMOF **1** was compacted to a copper cap under the press of 39.2 MPa and hit by a 2 kg drop hammer, and the calculated value of  $h_{50}$  represents the drop height of 50% initiation probability. Friction sensitivity of EMOF **1** was measured by applying a

Julius Peter's machine using a 20 mg sample.

## 7. Oxygen bomb calorimetry

The constant-volume combustion energy of EMOF **1** and H<sub>2</sub>DAAT were investigated by a precise C200 calorimeter (Germany IKA)<sup>[3]</sup>. Approximately 200 mg of the samples were pressed with a well-defined amount of benzoic acid to form a tablet to ensure better combustion. The recorded data are the average of six single measurements. The calorimeter was calibrated by the combustion of certified benzoic acid (Standard Reference Material, 39i, NIST) in an oxygen atmosphere at a pressure of 30.5 bar.

The experimental results for the constant volume combustion energy ( $\Delta_c U$ ) of the EMOF **1** and H<sub>2</sub>DAAT are -4075.28 kJ·mol<sup>-1</sup>, and -3972.54 kJ·mol<sup>-1</sup>, respectively. According to the formula,  $\Delta_c H_m^\theta = \Delta_c U_m^\theta + \Delta n_g RT$  ( $n_g$  is the total molar amount of gases in the products or reactants,  $R = 8.314 \text{ J} \cdot \text{mol}^{-1} \cdot \text{K}^{-1}$ ,  $T = 298.15 \text{ K}$ ), the standard molar enthalpies of combustion ( $\Delta_c H_m^\theta$ ) can be derived as being -4066.58 kJ·mol<sup>-1</sup>, and -3963.87 kJ·mol<sup>-1</sup> for equation S1-S2, respectively. The combustion reaction equations are listed as follows:

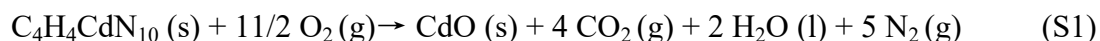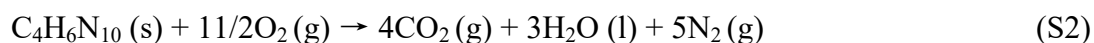

Based on the calculated enthalpies of combustion and known enthalpies of formation of the combustion products determined experimentally,  $\Delta_f H_m^\theta(\text{CdO}) = -258.35 \text{ kJ} \cdot \text{mol}^{-1}$ ,  $\Delta_f H_m^\theta(\text{CO}_2) = -393.51 \text{ kJ} \cdot \text{mol}^{-1}$ ,  $\Delta_f H_m^\theta(\text{H}_2\text{O}) = -285.83 \text{ kJ} \cdot \text{mol}^{-1}$  are obtained from literature<sup>[4]</sup>. On the basis of Hess's law in thermochemical equation, the standard enthalpies of formation ( $\Delta_f H_m^\theta$ ) of EMOF **1** and H<sub>2</sub>DAAT are calculated as 1662.53 kJ·mol<sup>-1</sup>, and 1532.34 kJ·mol<sup>-1</sup>, respectively.

## 8. Detonation property

As described in ref.5, the new and efficient method, which employed the hypothesis of Becker-Kistiakowsky-Wilson (BKW) equation and arbitrary theory of the K-J method, could be applied to perform the detonation performances of metal

compounds containing special elements. The overall calculation process can be described as follows: for the explosives composed of C, H, N, and O elements, all N atoms are converted to N<sub>2</sub>; O atoms form H<sub>2</sub>O with H atoms first and then form CO<sub>2</sub> with C atoms; the remaining C atoms are retained in solid state; if there are O atoms left, they will form O<sub>2</sub>. To preserve Kamlet's method, the developed theory is employed to determine the detonation products from metal-containing explosives. In most cases, metal atoms are converted to their oxidation states, emitting more heat after detonation. Otherwise, metal atoms can be treated as their reduction states, if the heat of formation (HOF) of metallic oxides is higher than that of H<sub>2</sub>O, or there is no O atom in the molecule. Besides, O atoms form H<sub>2</sub>O with H atoms first and the remaining ones then form CO<sub>2</sub> with C atoms. However, if the amount of O atoms is not sufficient to oxidize all H atoms, the remaining H atoms can produce NH<sub>3</sub> with N atoms, and the rest of the N atoms are released as N<sub>2</sub> gas. On the other hand, the remaining C atoms are retained in the solid state if they are not completely oxidized by O atoms. If there are redundant O atoms, however, they can be expelled as O<sub>2</sub>. The detonation reactions of EMOF 1 and H<sub>2</sub>DAAT estimated by the new method for compounds are described by the equation S3-S4. Detonation velocity (D) and detonation pressure (P) are of two compounds are investigated by Kamlet-Jacobos (K-J) equations, following as Equations (S5-S8)

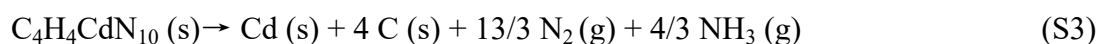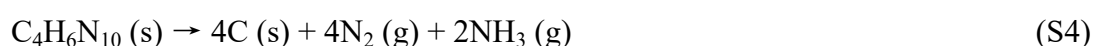

$$D = 1.01\phi^{1/2}(1 + 1.30\rho) \quad (\text{S5})$$

$$P = 1.558\phi\rho^2 \quad (\text{S6})$$

$$\Phi = 31.68N(MQ)^{1/2} \quad (\text{S7})$$

$$Q = \frac{-[\Delta H_f(\text{detonation products}) - \Delta H_f(\text{energetic compound})]}{\text{formula weight of energetic compound}} \quad (\text{S8})$$

where  $D$  is detonation velocity (km·s<sup>-1</sup>),  $P$  is detonation pressure (GPa),  $Q$  is heat of detonation (kcal·g<sup>-1</sup>),  $N$  is moles of detonation gases per gram of explosive,  $M$  is average molecular weight of the gases,  $\rho$  is density of explosive (g·cm<sup>-3</sup>).

The  $N$  and  $M$  of detonation reaction are given by equations (S7-S8)

$$N = \frac{\sum n_g}{\text{formula weight of explosive}} \quad (\text{S9})$$

$$M = \frac{\sum (n_g \times M_g)}{\sum n_g} \quad (\text{S10})$$

where  $n_g$  is the moles of each detonation gas per mole of explosive,  $M_g$  is the molecular weight of each detonation gas per mole of explosive. Utilizing the above equations, and the above experimentally determined  $\Delta_f H_m^\theta$  values of **1** and the known  $\text{NH}_3$  (g, -45.94  $\text{kJ}\cdot\text{mol}^{-1}$ ), the detonation velocity and detonation pressure for compounds can be obtained.

For EMOF **1**

$$\rho = 2.487 \text{ g}\cdot\text{cm}^{-3}$$

$$Q = \Delta H_{\text{det}} = -[4/3 \times (-45.94) - 1662.53]/304.58 = 5.66 \text{ kJ}\cdot\text{g}^{-1} = 1.36 \text{ kcal}\cdot\text{g}^{-1}$$

$$N = (13+4)/(3 \times 304.58) = 0.0186 \text{ mol}\cdot\text{g}^{-1}$$

$$M = (17.03 \times 4 + 28.01 \times 13)/17 = 25.43 \text{ g}\cdot\text{mol}^{-1}$$

$$\Phi = 31.68 \times 0.0186 \times (25.43 \times 1.36)^{1/2} = 3.47$$

$$P = 1.558 \times (2.487)^2 \times 3.47 = 33.44 \text{ GPa}$$

$$D = 1.01 \times (3.47)^{1/2} \times (1 + 1.30 \times 2.487) = 7.964 \text{ km}\cdot\text{s}^{-1}$$

For **H<sub>2</sub>DAAT**

$$\rho = 1.748 \text{ g}\cdot\text{cm}^{-3}$$

$$Q = \Delta H_{\text{det}} = -[2 \times (-45.94) - 1532.34]/194.19 = 8.36 \text{ kJ}\cdot\text{g}^{-1} = 1.998 \text{ kcal}\cdot\text{g}^{-1}$$

$$N = (4+2)/194.19 = 0.0309 \text{ mol}\cdot\text{g}^{-1}$$

$$M = (28 \times 4 + 17 \times 2)/6 = 24.33 \text{ g}\cdot\text{mol}^{-1}$$

$$\Phi = 31.68 \times 0.0309 \times (24.33 \times 1.998)^{1/2} = 6.83$$

$$P = 1.558 \times (1.748)^2 \times 6.83 = 32.51 \text{ GPa}$$

$$D = 1.01 \times (6.83)^{1/2} \times (1 + 1.30 \times 1.748) = 8.638 \text{ km}\cdot\text{s}^{-1}$$

## 9. NMR spectra

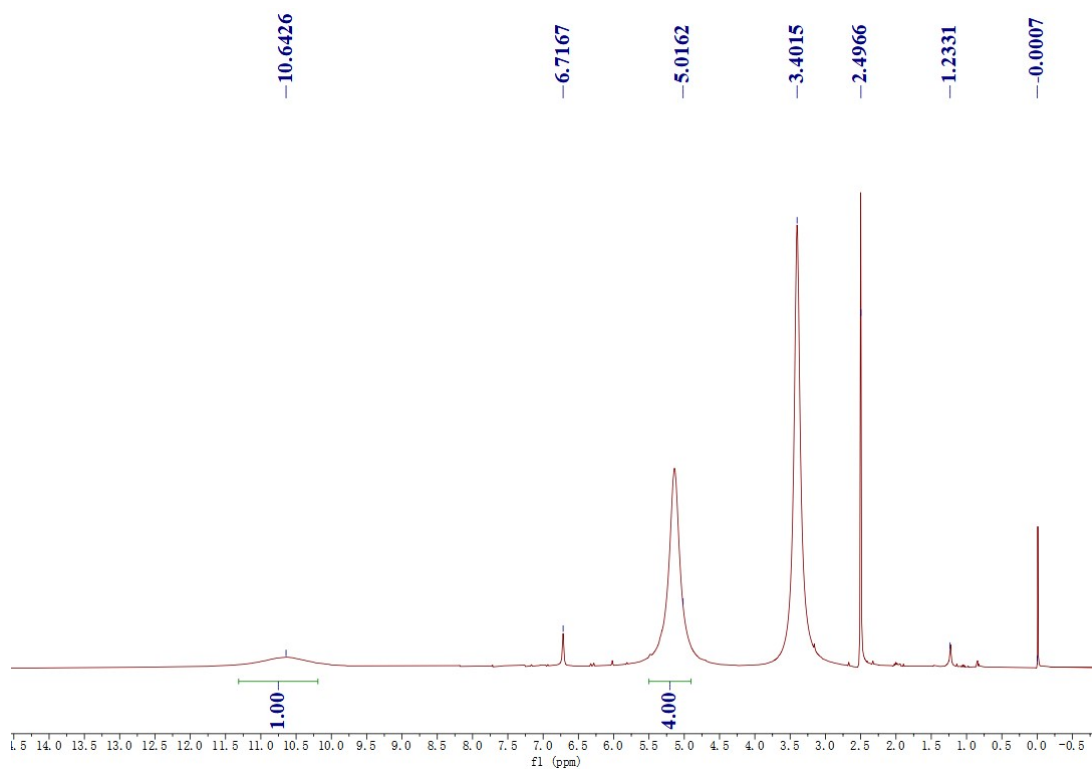

Fig. S8  $^1\text{H}$  NMR ( $[\text{D}_6]$  DMSO, 400 MHz) of **I**

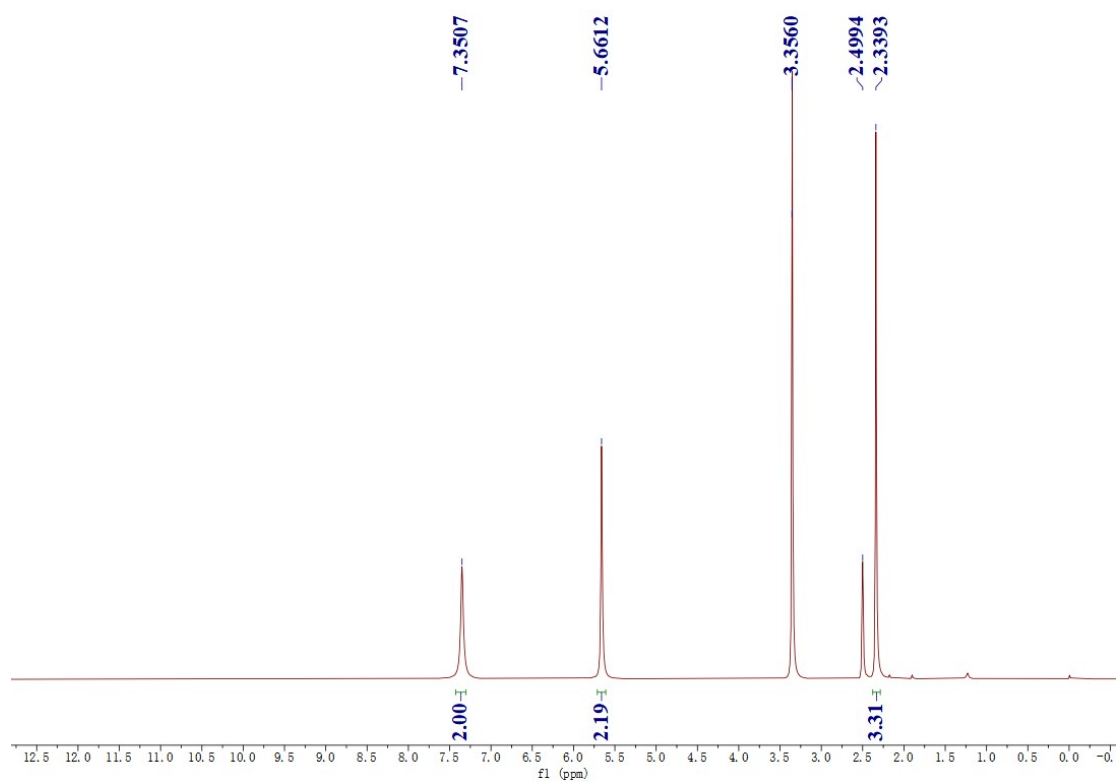

Fig. S9  $^1\text{H}$  NMR ( $[\text{D}_6]$  DMSO, 400 MHz) of **II**

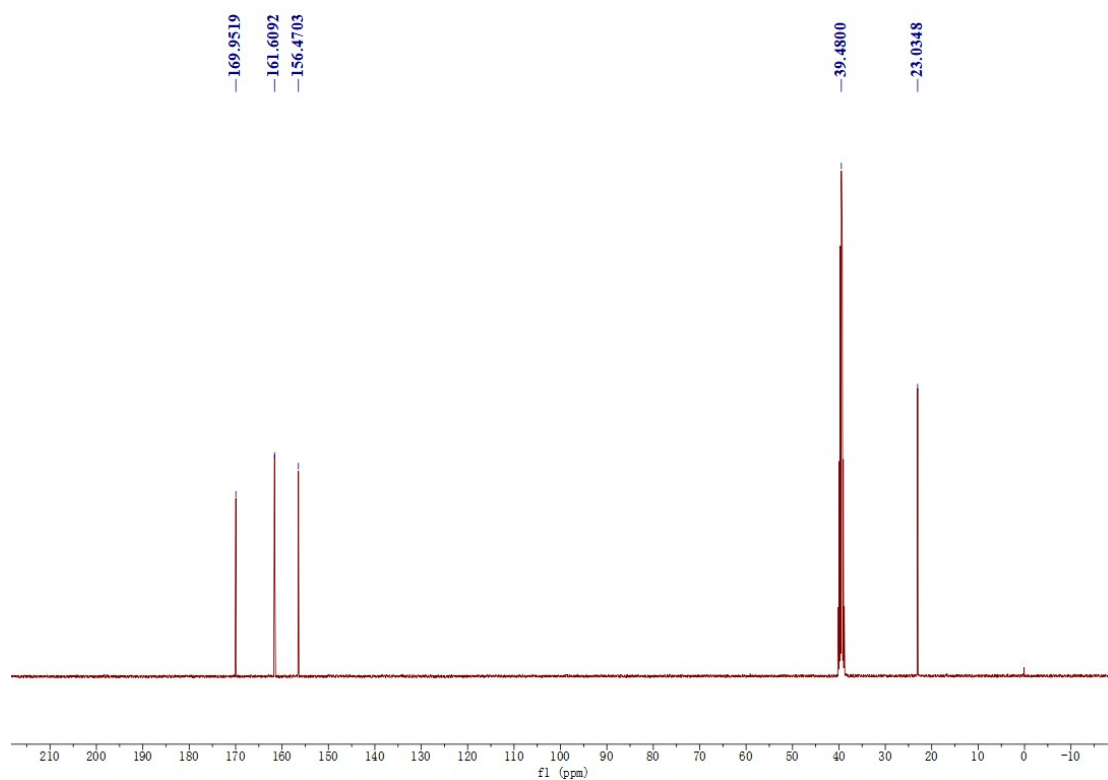

**Fig. S10**  $^{13}\text{C}$  NMR ( $[\text{D}_6]$  DMSO, 100 MHz) of **II**

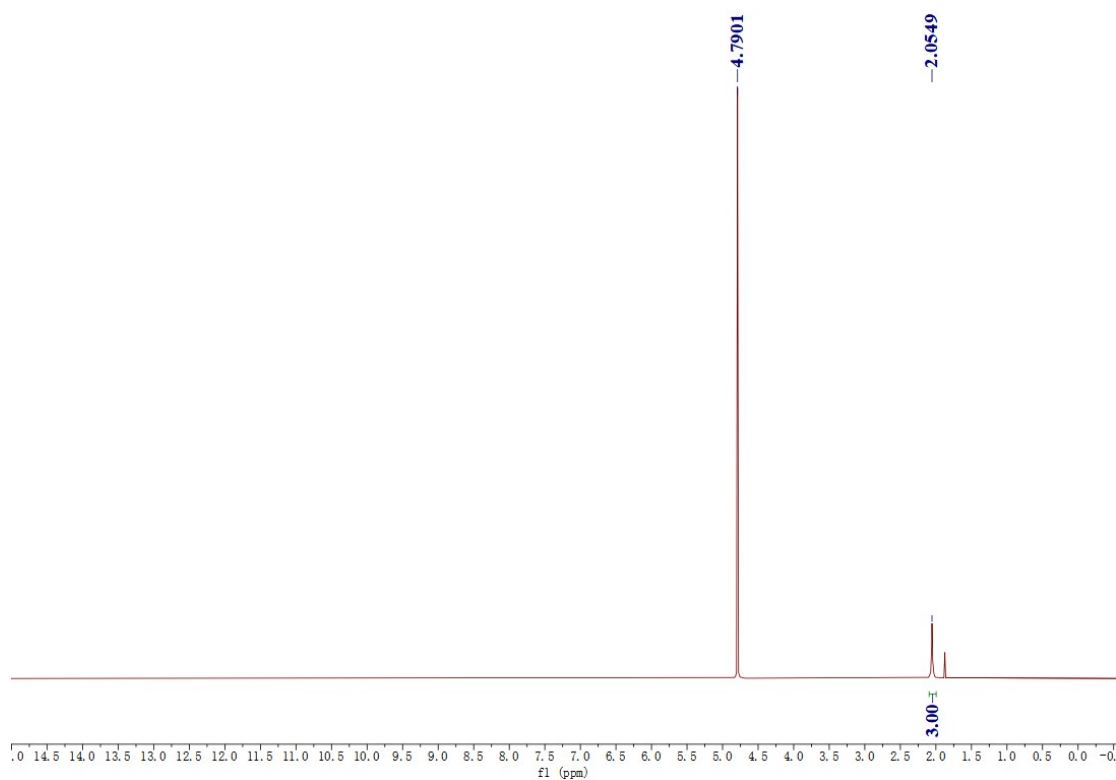

**Fig. S11**  $^1\text{H}$  NMR ( $\text{D}_2\text{O}$ , NaOH, 400 MHz) of **III**

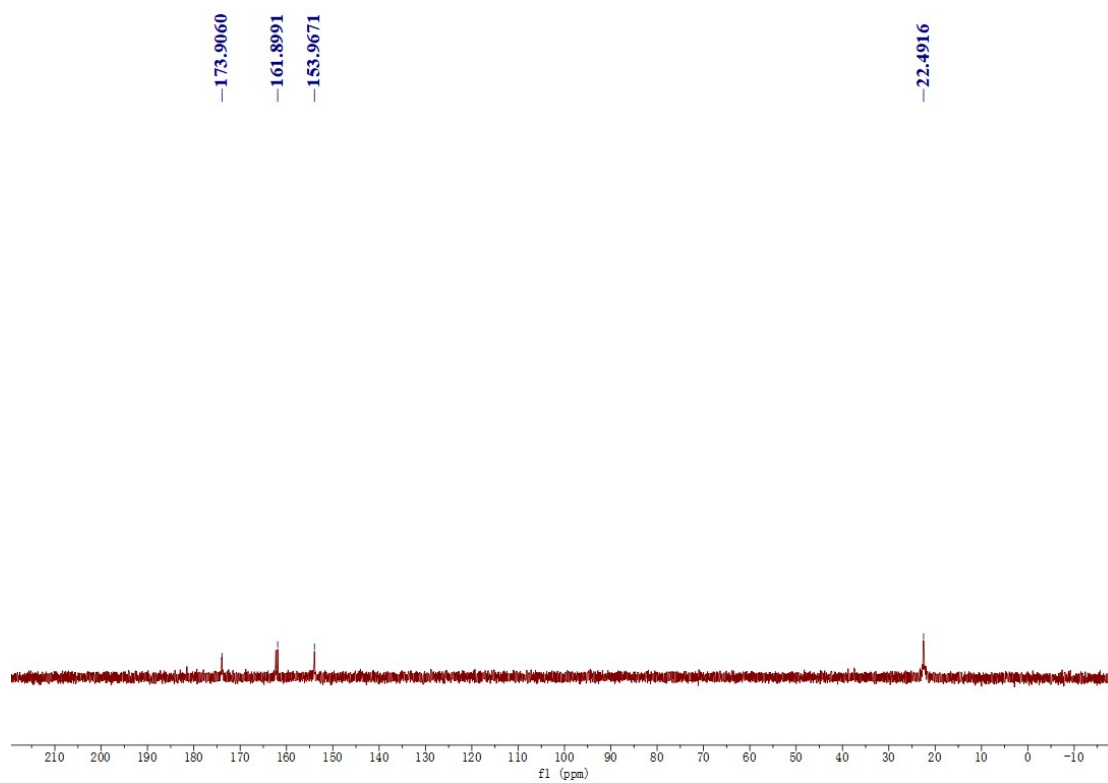

**Fig. S12**  $^{13}\text{C}$  NMR ( $\text{D}_2\text{O}$ , NaOH, 100 MHz) of **III**

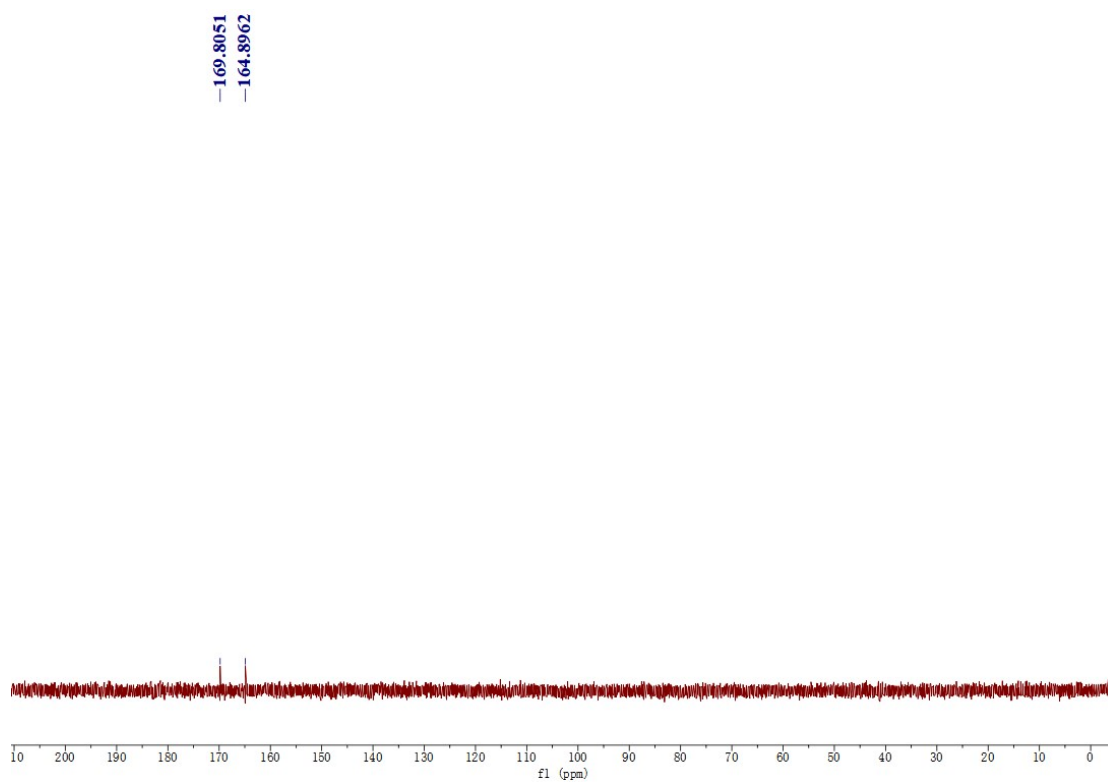

**Fig. S13**  $^{13}\text{C}$  NMR ( $\text{D}_2\text{O}$ , NaOH, 100 MHz) of **H<sub>2</sub>DAAT**

## 10. References

- [1] M. S. Pevzner, N. V. Gladkova, T. A. Kravchenko, 5-Amino-3-nitro-1,2,4-triazole and 5-nitramino-3-nitro-1,2,4-triazole, *Zh. Org. Khim.*, 1996, **32**, 1230-1233.
- [2] A. Dippold, T. M. Klapötke, F. A. Martin, Synthesis and characterization of bis(triaminoguanidinium) 5,5'-dinitrimino-3,3'-azo-1*H*-1,2,4-triazolate-A novel insensitive energetic material, *Z. Anorg. Allg. Chem.*, 2011, **637**, 1181-1193.
- [3] X. Yang, S. Chen, S. Gao, H. Li, Q. Shi, Construction of a rotating-bomb combustion calorimeter and measurement of thermal effects, *Instrum. Sci. Technol.*, 2002, **30**, 311-321.
- [4] Y. Wang, J. Zhang, H. Su, S. Li, S. Zhang, S. Pang, A simple method for the prediction of the detonation performances of metal-containing explosives, *J. Phys. Chem. A*, 2014, **118**, 4575-4581.
- [5] M. J. Kamlet, S. J. Jacobs, Chemistry of Detonations. I. A simple method for calculating detonation properties of C-H-N-O explosives, *J. Chem. Phys.*, 1968, **48**, 23-35.
